# Supplementary material for: Relationship between trajectories of dietary iron intake and risk of type 2 diabetes mellitus: evidence from a prospective cohort study
Source: Springer Nature journal article supplement (doi:10.1186/s12937-024-00925-5), 2024-02-02
Supplement: MOESM1 [file 12937_2024_925_MOESM1_ESM.pdf]

Wang, R, Liu, Y, Thabane, L, Olier, I, Li, L, Ortega-Martorell, S, Lip, GYH and Li, G

**Relationship between trajectories of dietary iron intake and risk of type 2 diabetes mellitus: evidence from a prospective cohort study**

<http://researchonline.ljmu.ac.uk/id/eprint/22616/>

#### Article

**Citation** (please note it is advisable to refer to the publisher's version if you intend to cite from this work)

**Wang, R, Liu, Y, Thabane, L, Olier, I, Li, L, Ortega-Martorell, S, Lip, GYH and Li, G (2024) Relationship between trajectories of dietary iron intake and risk of type 2 diabetes mellitus: evidence from a prospective cohort study. Nutrition Journal. 23 (1). p. 15.**

LJMU has developed [LJMU Research Online](http://researchonline.ljmu.ac.uk/) for users to access the research output of the University more effectively. Copyright © and Moral Rights for the papers on this site are retained by the individual authors and/or other copyright owners. Users may download and/or print one copy of any article(s) in LJMU Research Online to facilitate their private study or for non-commercial research. You may not engage in further distribution of the material or use it for any profit-making activities or any commercial gain.

The version presented here may differ from the published version or from the version of the record. Please see the repository URL above for details on accessing the published version and note that access may require a subscription.

For more information please contact [researchonline@ljmu.ac.uk](mailto:researchonline@ljmu.ac.uk)

**SFigure 1.** Flow diagram showing participant selection for this study

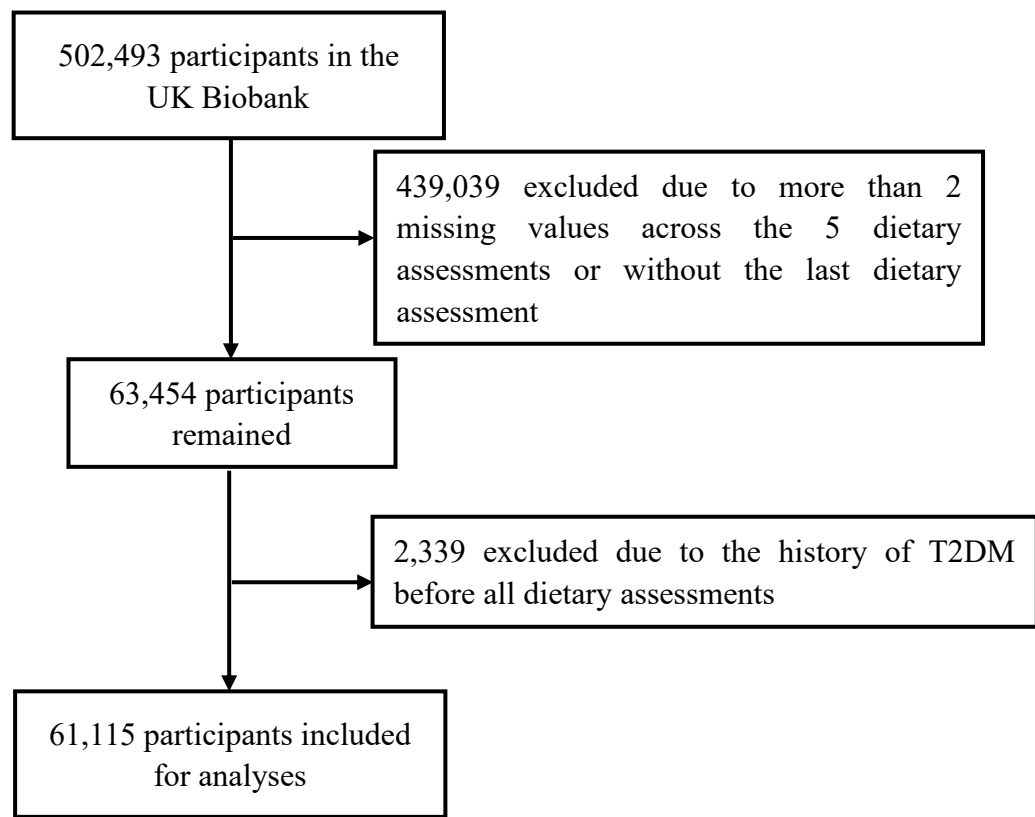

**STable 1.** Identification of history of and incident type 2 diabetes mellitus in this study

| <b>Data fields</b>     | <b>Fields' names</b>                            | <b>Data code</b>        |
|------------------------|-------------------------------------------------|-------------------------|
| 2443 <sup>1</sup>      | Diabetes diagnosed by physician                 | -                       |
| 6153/6177 <sup>1</sup> | Use of insulin for diabetes                     | -                       |
| 20003 <sup>1</sup>     | Treatment/medication code                       | 1140883066              |
| 20002 <sup>1</sup>     | Non-cancer illness codes, self-reported         | 1220, 1222, 1223        |
| 41270 <sup>2</sup>     | Diagnoses - ICD10                               | E10, E11, E12, E13, E14 |
| 41271 <sup>2</sup>     | Diagnoses – ICD9                                | 250                     |
| 40001 <sup>2</sup>     | Underlying (primary) cause of death: ICD10      | E10, E11, E12, E13, E14 |
| 40002 <sup>2</sup>     | Contributory (secondary) causes of death: ICD10 | E10, E11, E12, E13, E14 |

ICD = international classification of diseases

<sup>1</sup> for history of T2DM identification only

<sup>2</sup> for both history of and incident T2DM identification

**STable 2.** Model fit parameter (Bayesian information criterion-BIC) according to number of groups and trajectory shapes

| Number of groups | Trajectory shapes* | BIC (N=61,115) |
|------------------|--------------------|----------------|
| 2                | 3 3                | -645931.5      |
| 3                | 3 3 3              | -643009.8      |
| 3                | 1 3 3              | -646688.3      |
| 4                | 3 3 3 3            | -642380.7      |
| 4                | 1 3 3 3            | -646544.1      |
| 4                | 1 2 3 3            | -651734.7      |
| 5                | 3 3 3 3 3          | -643546.2      |

\*Trajectory shapes of the best fit model according to a given number of groups; 1 = linear; 2 = quadratic; 3 = cubic.

**STable 3.** Comparisons of model performances between the trajectory model and quartile model

| <b>Model</b>   | <b>AIC</b> | <b>C-statistic (95% CI)</b> |
|----------------|------------|-----------------------------|
| <b>Model 1</b> |            |                             |
| quartile       | 25207.18   | 0.78 (0.77, 0.79)           |
| trajectory     | 14018.50   | 0.78 (0.76, 0.79)           |
| <b>Model 2</b> |            |                             |
| quartile       | 16386.70   | 0.85 (0.83, 0.86)           |
| trajectory     | 9290.13    | 0.85 (0.83, 0.86)           |
| <b>Model 3</b> |            |                             |
| quartile       | 26695.56   | 0.52 (0.51, 0.54)           |
| trajectory     | 14855.63   | 0.54 (0.52, 0.56)           |

Model 1: adjusted for age, sex, BMI, and total energy.

Model 2: further adjusted for ethnicity, residence area, smoking status, alcohol drinking status, income, Townsend deprivation index, physical activity, hypertension, hypercholesterolemia, history of cardiovascular disease, glycated haemoglobin, and dietary intake of carbohydrates, protein, magnesium, fiber, and saturated fat.

Model 3: adjusted for no covariates.

**STable 4.** Relationship between dietary iron intake (mean dietary iron intake for each individual) and risk of type 2 diabetes mellitus from the mean grouping model\*

| <b>Mean dietary iron intake for each individual</b> | <b>Mean iron intake, mg/day</b> | <b>Hazard ratio (95% CI)</b> | <b>P-value</b> |
|-----------------------------------------------------|---------------------------------|------------------------------|----------------|
| <b>Quartile 1</b>                                   | 9.7                             | Ref                          | -              |
| <b>Quartile 2</b>                                   | 12.5                            | 0.73 (0.58, 0.90)            | < 0.01         |
| <b>Quartile 3</b>                                   | 14.7                            | 0.64 (0.50, 0.80)            | < 0.01         |
| <b>Quartile 4</b>                                   | 18.2                            | 0.69 (0.53, 0.89)            | < 0.01         |

\*Mean grouping model evaluated the association between mean dietary iron intake for each individual and risk of T2DM, in which we used the lowest quartile with the mean dietary iron intake of 9.7 mg/day as the reference group.

Model was adjusted for age, sex, BMI, total energy, ethnicity, residence area, smoking status, alcohol drinking status, income, Townsend deprivation index, physical activity, hypertension, hypercholesterolemia, history of cardiovascular disease, glycated haemoglobin, and dietary intake of carbohydrates, protein, magnesium, fiber, and saturated fat.

**STable 5.** Comparisons of model performances between the trajectory model and mean grouping model

| <b>Model</b>                                       | <b>Trajectory model</b>      | <b>Mean grouping model</b> |
|----------------------------------------------------|------------------------------|----------------------------|
| <b>Net reclassification improvement (NRI)</b>      | -0.06<br>(-0.13, 0.02)       |                            |
| <b>Integrated discrimination improvement (IDI)</b> | -0.0003<br>(-0.0007, 0.0001) |                            |
| <b>AIC</b>                                         | 13727.06                     | 13727.47                   |
| <b>C-statistic</b>                                 | 0.8482                       | 0.8468                     |

Both trajectory model and mean grouping model were adjusted for age, sex, BMI, total energy, ethnicity, residence area, smoking status, alcohol drinking status, income, Townsend deprivation index, physical activity, hypertension, hypercholesterolemia, history of cardiovascular disease, glycated haemoglobin, and dietary intake of carbohydrates, protein, magnesium, fiber, and saturated fat.

**STable 6.** Relationship between dietary iron intake trajectory groups and risk of type 2 diabetes mellitus using competing risk model

| Iron intake trajectory group | No. of competing events | Parsimonious model    |         | Fully-adjusted model  |         |
|------------------------------|-------------------------|-----------------------|---------|-----------------------|---------|
|                              |                         | Hazard ratio (95% CI) | P-value | Hazard ratio (95% CI) | P-value |
| <b>1</b>                     | 225                     | Ref                   | -       | Ref                   | -       |
| <b>2</b>                     | 230                     | 0.79 (0.63, 0.99)     | 0.04    | 0.81 (0.64, 1.01)     | 0.07    |
| <b>3</b>                     | 362                     | 0.64 (0.51, 0.80)     | < 0.01  | 0.62 (0.49, 0.79)     | < 0.01  |
| <b>4</b>                     | 255                     | 0.70 (0.55, 0.89)     | < 0.01  | 0.70 (0.54, 0.92)     | < 0.01  |

Parsimonious model: adjusted for age, sex, BMI, and total energy.

Fully-adjusted model: further adjusted for ethnicity, residence area, smoking status, alcohol drinking status, income, Townsend deprivation index, physical activity, hypertension, hypercholesterolemia, history of cardiovascular disease, glycated haemoglobin, and dietary intake of carbohydrates, protein, magnesium, fiber, and saturated fat.

**STable 7.** Relationship between dietary iron intake trajectory groups and risk of type 2 diabetes mellitus by further adjusted for red meat\*

| Iron intake trajectory group | Hazard ratio (95% CI) | P-value |
|------------------------------|-----------------------|---------|
| <b>1</b>                     | Ref                   | -       |
| <b>2</b>                     | 0.81 (0.65, 1.02)     | 0.07    |
| <b>3</b>                     | 0.62 (0.49, 0.79)     | < 0.01  |
| <b>4</b>                     | 0.70 (0.54, 0.91)     | < 0.01  |

\* Model were adjusted for age, sex, BMI, total energy, ethnicity, residence area, smoking status, alcohol drinking status, income, Townsend deprivation index, physical activity, hypertension, hypercholesterolemia, history of cardiovascular disease, glycated haemoglobin, red meat, and dietary intake of carbohydrates, protein, magnesium, fiber, and saturated fat.

**STable 8.** Relationship between dietary iron intake trajectory groups and risk of type 2 diabetes mellitus by further adjusted for vitamin C and calcium\*

| Iron intake trajectory group | Hazard ratio (95% CI) | P-value |
|------------------------------|-----------------------|---------|
| <b>1</b>                     | Ref                   | -       |
| <b>2</b>                     | 0.81 (0.64, 1.02)     | 0.07    |
| <b>3</b>                     | 0.62 (0.49, 0.79)     | < 0.01  |
| <b>4</b>                     | 0.70 (0.54, 0.91)     | < 0.01  |

\* Model were adjusted for age, sex, BMI, total energy, ethnicity, residence area, smoking status, alcohol drinking status, income, Townsend deprivation index, physical activity, hypertension, hypercholesterolemia, history of cardiovascular disease, glycated haemoglobin, vitamin C, calcium, and dietary intake of carbohydrates, protein, magnesium, fiber, and saturated fat.

**STable 9.** Relationship between dietary iron intake trajectory groups and risk of type 2 diabetes mellitus by further adjusted for iron supplement\*

| Iron intake trajectory group | Hazard ratio (95% CI) | P-value |
|------------------------------|-----------------------|---------|
| <b>1</b>                     | Ref                   | -       |
| <b>2</b>                     | 0.81 (0.65, 1.02)     | 0.07    |
| <b>3</b>                     | 0.62 (0.49, 0.79)     | < 0.01  |
| <b>4</b>                     | 0.70 (0.54, 0.91)     | < 0.01  |

\* Model were adjusted for age, sex, BMI, total energy, ethnicity, residence area, smoking status, alcohol drinking status, income, Townsend deprivation index, physical activity, hypertension, hypercholesterolemia, history of cardiovascular disease, glycated haemoglobin, iron supplement, and dietary intake of carbohydrates, protein, magnesium, fiber, and saturated fat.

**STable 10.** Relationship between dietary iron intake trajectory groups and risk of type 2 diabetes mellitus by further adjusted for red meat, vitamin C, calcium, and iron supplement\*

| Iron intake trajectory group | Hazard ratio (95% CI) | P-value |
|------------------------------|-----------------------|---------|
| <b>1</b>                     | Ref                   | -       |
| <b>2</b>                     | 0.81 (0.65, 1.02)     | 0.07    |
| <b>3</b>                     | 0.62 (0.49, 0.79)     | < 0.01  |
| <b>4</b>                     | 0.70 (0.54, 0.91)     | < 0.01  |

\* Model were adjusted for age, sex, BMI, total energy, ethnicity, residence area, smoking status, alcohol drinking status, income, Townsend deprivation index, physical activity, hypertension, hypercholesterolemia, history of cardiovascular disease, glycated haemoglobin, red meat, vitamin C, calcium, iron supplement, and dietary intake of carbohydrates, protein, magnesium, fiber, and saturated fat.
